# Supplementary material
Source: PubMed Central journal article supplement (PMC4800051)
Supplement: mmc1.pdf [file mmc1.pdf]

**Supplemental Information**

**Mosaic Activating Mutations in *FGFR1* Cause**

**Encephalocraniocutaneous Lipomatosis**

**James T. Bennett, Tiong Yang Tan, Diana Alcantara, Martine Tétrault, Andrew E. Timms, Dana Jensen, Sarah Collins, Malgorzata J.M. Nowaczyk, Marjorie J. Lindhurst, Katherine M. Christensen, Stephen R. Braddock, Heather Brandling-Bennett, Raoul C.M. Hennekam, Brian Chung, Anna Lehman, John Su, SuYuen Ng, David J. Amor, Jacek Majewski, Les G. Biesecker, Kym M. Boycott, William B. Dobyns, Mark O'Driscoll, Ute Moog, Laura M. McDonell, University of Washington Center for Mendelian Genomics, and Care4Rare Canada Consortium**

1 **SUPPLEMENTAL DATA**

2 **TABLE S1.** Capture methods and coverage summary of exome data

|                                   | LR12-068                         |             | LR13-278        |             |                | LR13-175    |          | IN_0039                |                 | NIH_183             |         |
|-----------------------------------|----------------------------------|-------------|-----------------|-------------|----------------|-------------|----------|------------------------|-----------------|---------------------|---------|
|                                   | Tumor*                           | Scalp nevus | Unaffected skin | Scalp nevus | Eyelid dermoid | Scalp nevus | Lipoma   | Scalp nevus            | Unaffected skin | Scalp nevus         | Blood*  |
| <b>Capture Method</b>             | SeqCap EZ Exome Library v2.0 kit |             |                 |             |                |             |          | SureSelect All Exon V5 |                 | SeqCap EX Exome+UTR |         |
| <b>Mean Coverage</b>              | 122X                             | 160X        | 161X            | 160X        | 150X           | 169X        | 172X     | 106X                   | 105X            | 65X                 | 64X     |
| <b>% Covered &gt; 20X</b>         | 95.9                             | 97.7        | 97.3            | 97.1        | 96.6           | 97.8        | 97.9     | 94.7                   | 94.7            | 83.1                | 84.4    |
| <b>c.1638C&gt;A (p.Asn546Lys)</b> | 0% (47)                          | 0% (98)     | 35% (74)        | 42% (99)    | 54% (92)       | 0% (93)     | 0% (105) | 33% (76)               | 23% (61)        | 0% (24)             | 0% (39) |
| <b>c.1966A&gt;G (p.Lys656Glu)</b> | 32% (127)                        | 47% (182)   | 0% (219)        | 0% (172)    | 0% (181)       | 0% (202)    | 0% (205) | 0% (70)                | 0% (90)         | 45% (29)            | 0% (40) |

3 All DNA isolated from cultured fibroblasts cultured from biopsied tissue except those with asterisk  
 4 (\*), in which DNA was directly isolated from tissue without culture.

5  
6

7 **TABLE S2:** Exome sequencing and variant filtering pipelines

| <i>Sample</i>                           | <b>LR12-068, LR13-278, LR13-175</b>                                  | <b>IN_0039</b>                                                                                        | <b>NIH_183</b>                                                       |
|-----------------------------------------|----------------------------------------------------------------------|-------------------------------------------------------------------------------------------------------|----------------------------------------------------------------------|
| <i>Sequencing platform</i>              | HiSeq 2000 (Illumina)                                                | HiSeq 2000 (Illumina)                                                                                 | HiSeq 2500 (Illumina)                                                |
| <i>Sequence alignment</i>               | Burrows-Wheeler Aligner                                              | Burrows-Wheeler Aligner                                                                               | Novoalign                                                            |
| <i>Variant calling &amp; annotation</i> | Unified Genotyper, SeattleSeq Annotation Server                      | GATK, SAMtools, BCFtools, custom script                                                               | Shimmer, Mutect, Somatic Sniper                                      |
| <i>Filtering</i>                        | missense,nonsense, & splice variants with < 1% in EVS, ExAC, & dbSNP | missense,nonsense, & splice variants with < 1% in EVS, ExAC, & dbSNP. Not seen in > 5 in-house exomes | missense, nonsense and splice variants with < 2% ClinSeq™ frequency* |

8 \*ClinSeq™ frequency is defined as the number of individuals with alternative allele  
 9 frequency ≥1%, divided by the number of individuals with at least ten reads at that  
 10 position. This is a population frequency based filter that is not limited to constitutional  
 11 variants (as is the case with EVS, EXAC, and dbSNP), and is based on the NIH in house  
 12 ClinSeq dataset (www.genome.gov/25521305)

13  
14

15 **TABLE S3:** Primers used for subcloning 1408 basepair fragment containing c.1681G>A  
 16 (p.Val561Met) and c.1966A>G (p.Lys656Glu)

17

| <b>Name</b>  | <b>Sequence</b>      |
|--------------|----------------------|
| FGFR1_ex14_F | CTTTGAGGTGAAGCCAAACC |
| FGFR1_ex15_R | ACCCCACTCCTTGCTTCTC  |

18

1 **TABLE S4:** Sequences for *FGFR1* smMIPs

| Name                      | Sequence                                                                               |
|---------------------------|----------------------------------------------------------------------------------------|
| FGFR1_01                  | GAGCTCTGGCTCTGGCACGGGCTTCAGCTTCCCGATATCCGACGGTAGTGTNNNNNGGGTGTGGGAAAGCTGGGGG           |
| FGFR1_02                  | CACGCCCTCCCAGACTCCACTTCAGCTTCCCGATATCCGACGGTAGTGTNNNNNTTCCCGACACCCGGAGCTCTACGT         |
| FGFR1_03                  | GGGCCCTCCTCCCTGCTCAGGGAGGTGCTTCAGCTTCCCGATATCCGACGGTAGTGTNNNNNATGAGAGAAGACGGAA         |
| FGFR1_04                  | CCCACTGCGTGACGCACCTTCAGCTTCCCGATATCCGACGGTAGTGTNNNNNGTACATGATGATCGGGACTGTGGC           |
| FGFR1_05                  | CGTCTCTGGAGATGGATACTCTAGTCTTCAGCTTCCCGATATCCGACGGTAGTGTNNNNNCTGGTTGGAGGTCAA            |
| FGFR1_06                  | GCAAAATGGGCGGAGAGCCACAGGGTGTACTTCAGCTTCCCGATATCCGACGGTAGTGTNNNNNTGGTGCACTTACTGGG       |
| FGFR1_07                  | TGAGCCAGGCCTGGGGCACTTCAGCTTCCCGATATCCGACGGTAGTGTNNNNNTGGGAGATCTTACTCTGGGCGG            |
| FGFR1_08                  | CGCATGGACAAGCCAGTAACTGCACCAACTTCAGCTTCCCGATATCCGACGGTAGTGTNNNNNAACACCTGTGGCTCT         |
| FGFR1_09                  | TGGCCCAAGCAGGGCCATGACTTCAGCTTCCCGATATCCGACGGTAGTGTNNNNNTCTCTATCCACACCTCCCTGGCA         |
| FGFR1_10                  | CCTCTGTACCAGGACATTCTGGCTGCCCTTCAGCTTCCCGATATCCGACGGTAGTGTNNNNNACTCCTTGCTTCTCA          |
| FGFR1_11                  | CGCACGGGACATTACCACATCGACTACTTCAGCTTCCCGATATCCGACGGTAGTGTNNNNNCAGAGCCTTCCAGCTC          |
| FGFR1_12                  | GGGTTGTGGCTGGGGTGTCTTCAGCTTCCCGATATCCGACGGTAGTGTNNNNNAAGACTAGGGGGGCTGTGCCAC            |
| FGFR1_13                  | AGCAGCTCTCTCAAGGACTGGTGTCCCTTCAGCTTCCCGATATCCGACGGTAGTGTNNNNNTTCTCTGTGCTCG             |
| FGFR1_14                  | CCACCCCAAGCAGCACACCTTCAGCTTCCCGATATCCGACGGTAGTGTNNNNNGGGGCTCCGGGCTGCAGGACTCC           |
| FGFR1_15                  | GCTAGGGAAGGGGTTAAGAGAGGCTGCTTCAGCTTCCCGATATCCGACGGTAGTGTNNNNNGGGAAGCATAAGAATA          |
| FGFR1_16                  | CGCAGGATGGTGGTGCCGGCAGACTGCTTCAGCTTCCCGATATCCGACGGTAGTGTNNNNNCAAGTAAATGAGTCTCA         |
| FGFR1_17                  | CCCATTCAAGCAAACAGCAGGCTTCAGCTTCCCGATATCCGACGGTAGTGTNNNNNTGGGAGAGGGCTGCTTTGGG           |
| FGFR1_18                  | CGTGTGACCAAAGTGGCTGTGAAGATGCTTCAGCTTCCCGATATCCGACGGTAGTGTNNNNNAACTTACCAGCCCAA          |
| FGFR1_19                  | CGAACCAGAAGAACCCAGAGTTCATGGACTTCAGCTTCCCGATATCCGACGGTAGTGTNNNNNAATGCCTTCAAAAAGT        |
| FGFR1_20                  | GCAAGGAGGGGGACGGGGTACTCTCTTCAGCTTCCCGATATCCGACGGTAGTGTNNNNNTCATACTCAGAGACC             |
| FGFR1_21                  | TGCACACTCAGCACCCCTTCAGCTTCCCGATATCCGACGGTAGTGTNNNNNATCTCTGCATGGTGGGGTCCGGTATC          |
| FGFR1_22                  | GGTACCAAGAAGAGTGACTTCCACAGCCACTTCAGCTTCCCGATATCCGACGGTAGTGTNNNNNACTGACTCAGCCCTG        |
| FGFR1_23_SNP <sub>a</sub> | AGGCC <b>G</b> GCAGTGATGACCTCGCCCTGACTTCAGCTTCCCGATATCCGACGGTAGTGTNNNNNATGGTTCTTCTCCCT |
| FGFR1_23_SNP <sub>b</sub> | AGGCC <b>A</b> GCAGTGATGACCTCGCCCTGACTTCAGCTTCCCGATATCCGACGGTAGTGTNNNNNATGGTTCTTCTCCCT |
| FGFR1_24_SNP <sub>a</sub> | CGTGCC <b>C</b> GTGGCGAGGGCAGGACATCTTCAGCTTCCCGATATCCGACGGTAGTGTNNNNNCTAGGGAAGCTCTTCTC |
| FGFR1_24_SNP <sub>b</sub> | CGTGCC <b>T</b> GTGGCGAGGGCAGGACATCTTCAGCTTCCCGATATCCGACGGTAGTGTNNNNNCTAGGGAAGCTCTTCTC |
| FGFR1_25                  | GGGGAGACACAGAGGCAGGAGAGCTGCTTCAGCTTCCCGATATCCGACGGTAGTGTNNNNNGTCTTGGCGGGTAAAC          |
| FGFR1_26                  | CGGAAGCAAAATGGACAAGCACAGGACCTTCAGCTTCCCGATATCCGACGGTAGTGTNNNNNAGTGATGGGAGAGTC          |
| FGFR1_27                  | CGTCACTGGGGCTTTGGGGTCACTTCACTTCAGCTTCCCGATATCCGACGGTAGTGTNNNNNACACACTCCATCTCA          |
| FGFR1_28                  | AGTAACAGAGGTCACAAAGTGGAGGTGAGCTTCAGCTTCCCGATATCCGACGGTAGTGTNNNNNTGGGAAGGAGACCAT        |
| FGFR1_29                  | CGGGGGCTCAAGTCTCTGTGGGACGCTTCAGCTTCCCGATATCCGACGGTAGTGTNNNNNGCACATCCAGTGCTAAAG         |
| FGFR1_30                  | CGGTGAGGGGACCGCTCTGTGGACTTCAGCTTCCCGATATCCGACGGTAGTGTNNNNNAACTTGTCTCCATTACCTC          |
| FGFR1_31                  | GGGTGGGCTCACTGCGCCTTCAGCTTCCCGATATCCGACGGTAGTGTNNNNNTTACACATGAACCTCCAGTTGCTACC         |
| FGFR1_32                  | AAGAGCCAGGCTTGGAGAACACAGCCCTTCAGCTTCCCGATATCCGACGGTAGTGTNNNNNTGGACTCTGTGGTGCCT         |
| FGFR1_33                  | GGCAACTACACTGATTGTGGAGACTTCAGCTTCCCGATATCCGACGGTAGTGTNNNNNAGGTGCCACGGGGTGC             |
| FGFR1_34                  | AGGGGAGGCCGAGTTAGGAAGTCTGATTCTTCAGCTTCCCGATATCCGACGGTAGTGTNNNNNCAAATGCCCTTCCAGT        |
| FGFR1_35                  | GGGACCCCAAACCCACACCTTCAGCTTCCCGATATCCGACGGTAGTGTNNNNNAGTCTCTTCCACCTGCCT                |
| FGFR1_36                  | GGGAAGAAGAAGGGGCACTGAGGTTCTCTTCAGCTTCCCGATATCCGACGGTAGTGTNNNNNCAGACCAAAGGGCAG          |
| FGFR1_37                  | GGACACCTCCCATGGGGATCTTCAGCTTCCCGATATCCGACGGTAGTGTNNNNNTTCTCTCTGAAGAGGAGTCA             |
| FGFR1_38_SNP <sub>a</sub> | GGGCAC <b>G</b> GAGTCTGCACCTCCTTCAGCTTCCCGATATCCGACGGTAGTGTNNNNNTGGCAGAGAGGGCTGGAGGGG  |
| FGFR1_38_SNP <sub>b</sub> | GGGCAC <b>A</b> GAGTCTGCACCTCCTTCAGCTTCCCGATATCCGACGGTAGTGTNNNNNTGGCAGAGAGGGCTGGAGGGG  |
| FGFR1_39                  | TGCTCTGCACATGTCCTTCAGCTTCCCGATATCCGACGGTAGTGTNNNNNTGGTGTACTGCCGAGGGGCTGCTG             |
| FGFR1_40                  | TCAACTGGCTGCGGACGCTTCAGCTTCCCGATATCCGACGGTAGTGTNNNNNTCTCTGCCCTTGGCTCCCTTC              |
| FGFR1_41                  | CGTAATAAAAAAACCCTTCGAGAGGGCCCTTCAGCTTCCCGATATCCGACGGTAGTGTNNNNNTTGGGGCTCTCTCC          |
| FGFR1_42                  | GGGCAGCTGGACTCTGGGCTTGGGACTTCAGCTTCCCGATATCCGACGGTAGTGTNNNNNTACCAACCTTAACT             |
| FGFR1_43                  | GGATGTGGAGCTGGAAGTGCCTCTCTTCAGCTTCCCGATATCCGACGGTAGTGTNNNNNTCCCTACCTAGACCT             |
| FGFR1_44                  | CCCTCTGATGAGTGGGAAACTGAGATGTGCTTCAGCTTCCCGATATCCGACGGTAGTGTNNNNNTACTCTACCAGACAC        |

2 Sequences of all 47 smMIPs used in this study are listed. The string of five N's  
 3 represents the degenerate molecular tag. Three smMIPs overlapped a common SNP, so  
 4 smMIPs complimentary to both alleles (in red) were used, and labeled "a" and "b"

1 **TABLE S5:** Coverage depth at the two *FGFR1* mutation sites for each sample  
 2 sequenced by smMIPs  
 3

| Cohort            | Individual              | Tissue          | c.1638C>A<br>(p.Asn546Lys) | c.1966A>G<br>(p.Lys656Glu) |
|-------------------|-------------------------|-----------------|----------------------------|----------------------------|
| Exome sequencing  | LR13-278                | Unaffected Skin | 50/160 (31%)               | 0/22                       |
|                   |                         | Scalp Nevus     | 52/108 (48%)               | 0/12                       |
|                   |                         | Eyelid Dermoid  | 42/76 (55%)                | low coverage               |
|                   |                         | Blood           | 0/153                      | 0/29                       |
|                   |                         | Saliva          | 0/27                       | 0/28                       |
|                   | IN_0039                 | Scalp Nevus     | 30/83 (36%)                | low coverage               |
|                   |                         | Saliva          | 0/114                      | low coverage               |
|                   |                         | Buccal          | 0/40                       | low coverage               |
|                   |                         | Blood           | 0/51                       | low coverage               |
|                   | Tissue biopsy available | LR14-261        | Scalp Nevus                | 110/199 (55%)              |
| Saliva            |                         |                 | 0/36                       | low coverage               |
| LR04-090          |                         | Unaffected skin | 0/119                      | 0/22                       |
|                   |                         | Saliva          | 0/228                      | 0/36                       |
|                   |                         | Blood           | 0/119                      | 0/23                       |
| LR09-120          |                         | Scalp Nevus     | 0/35                       | 0/19                       |
|                   |                         | Saliva          | 0/124                      | 0/24                       |
| IN_0025           |                         | Lipoma          | 0/117                      | 0/22                       |
|                   |                         | Blood           | 0/211                      | 0/26                       |
|                   |                         | Saliva          | 0/94                       | 0/25                       |
| Blood/Saliva Only | LR04-093                | Blood           | 0/152                      | 0/39                       |
|                   | LR09-252                | Saliva          | 0/105                      | 0/28                       |
|                   | LR14-210                | Blood           | 0/227                      | 0/49                       |

4 Low coverage was defined as less than 10 independent reads  
 5  
 6
